# Supplementary material for: Impact of Rehabilitation on Physical and Neuropsychological Health of Patients Who Acquired COVID-19 in the Workplace
Source: MDPI journal article supplement (doi:10.3390/ijerph20021468), 2023-01-13
Supplement: s1 [file s1]

## Post-COVID Symptoms

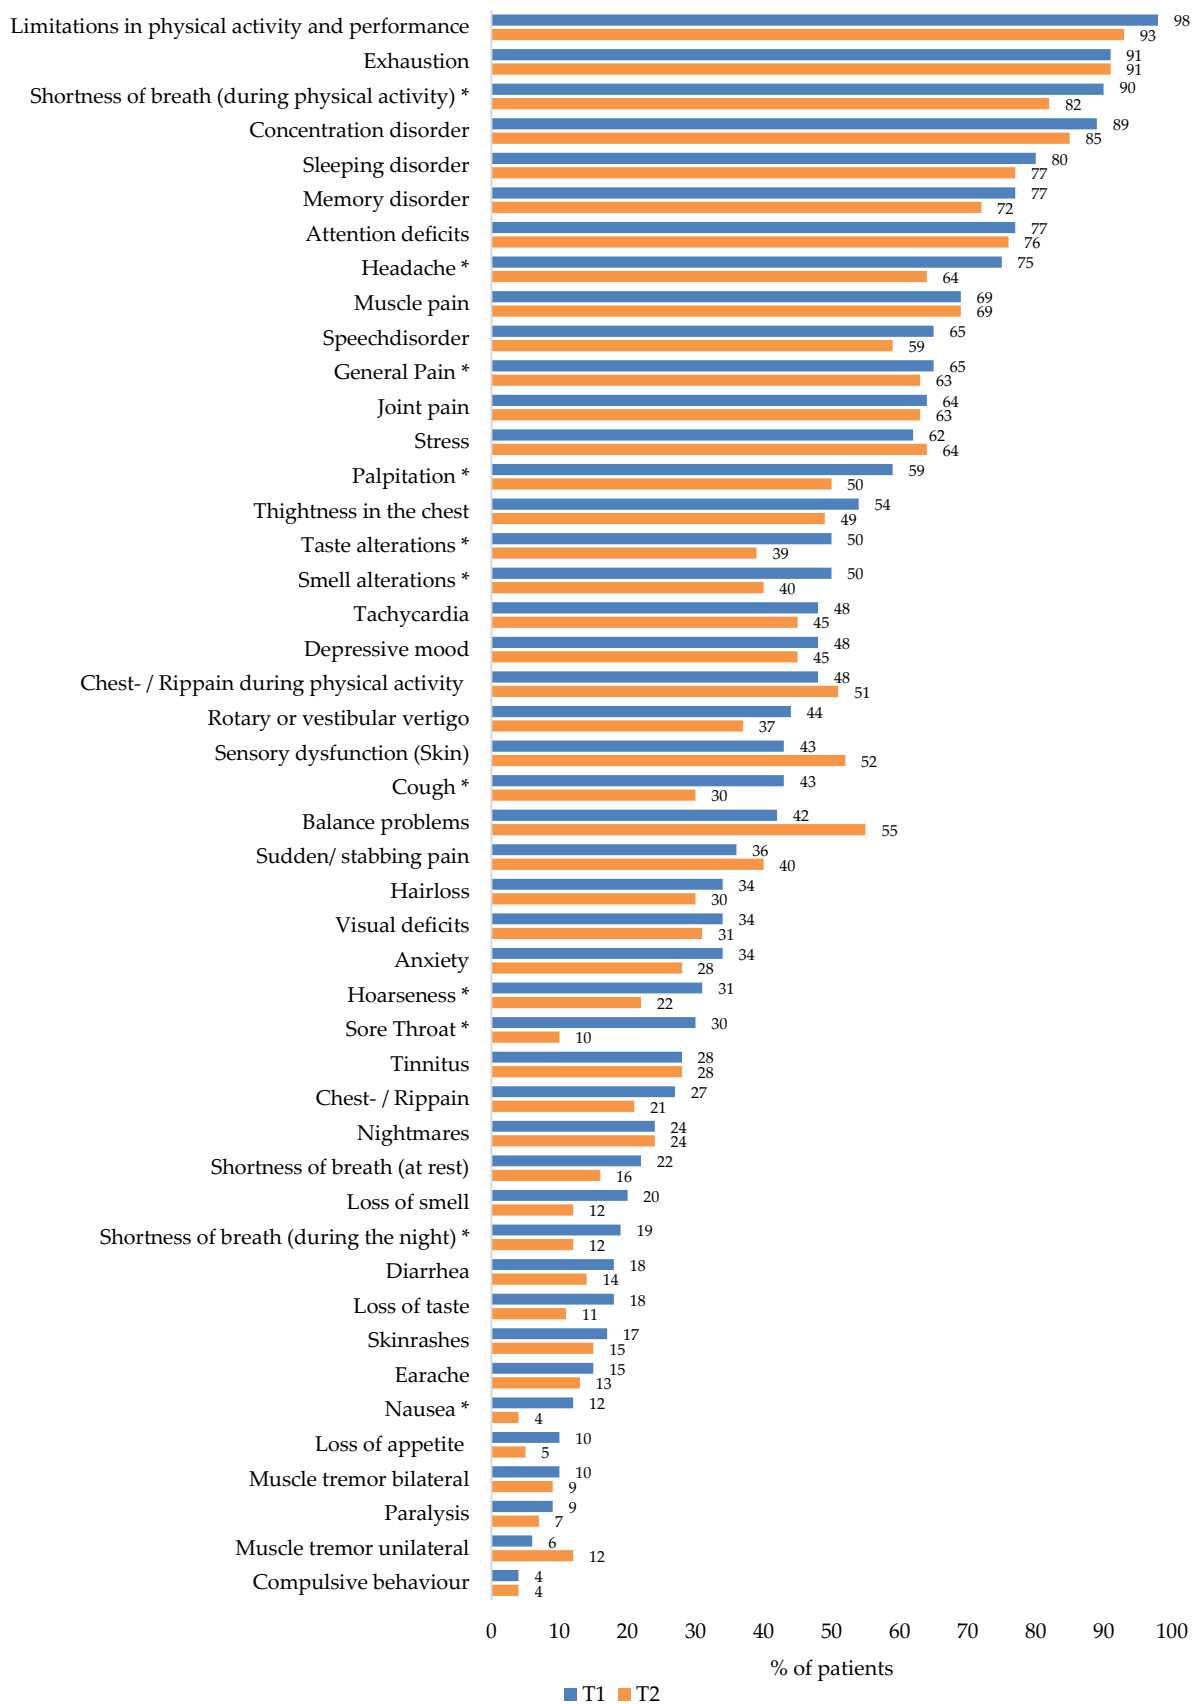

**Figure S1:** Ongoing symptoms related to long-/post-COVID before (T1, blue) and after (T2, orange) rehabilitation. Significant differences between T1 and T2 are marked with \* ( $p < 0.05$ ).

**Table S1:** Groupwise comparison of patients with a mild/moderate COVID-19 infection and a severe/critical COVID-19 infection at timepoint T1

|                               | Mild/Moderate COVID-19 |                           | Severe/ critical COVID-19 |                           | Between-group differences |       |        |
|-------------------------------|------------------------|---------------------------|---------------------------|---------------------------|---------------------------|-------|--------|
|                               | N                      | Median (IQR)              | N                         | Median (IQR)              | z                         | p     | r      |
| Physical Performance          |                        |                           |                           |                           |                           |       |        |
| 6MWD [m]                      | 91                     | 525.00<br>(440.00-583.00) | 36                        | 498.50<br>(447.75-542.75) | -1.388                    | 0.165 | -0.123 |
| 1MSTST                        | 90                     | 20<br>(16-24)             | 36                        | 17.50<br>(14-22)          | -1.568                    | 0.117 | -0.140 |
| Handgrip strength [kg]        | 91                     | 27.90<br>(20.83-35.30)    | 36                        | 26.90<br>(20.33-34.83)    | 0.027                     | 0.979 | 0.002  |
| Quadriceps strength [kg]      | 91                     | 92.96<br>(69.60-130.38)   | 36                        | 103.59<br>(65.91-133.74)  | -0.045                    | 0.964 | -0.004 |
| Subjective physical ability   | 90                     | 4.78<br>(3.53-6.03)       | 36                        | 4.61<br>(3.03-7.17)       | -0.829                    | 0.407 | -0.074 |
| Neuropsychological Parameters |                        |                           |                           |                           |                           |       |        |
| MoCA score                    | 91                     | 27<br>(26-29)             | 36                        | 26.5<br>(25-28)           | -2.598                    | 0.009 | -0.231 |
| DSST                          | 91                     | 47<br>(39-54)             | 36                        | 41.5<br>(34-51.5)         | -2.283                    | 0.022 | -0.203 |
| HADSdepression                | 91                     | 7<br>(4-10)               | 36                        | 6<br>(3-9.3)              | 1.210                     | 0.226 | 0.108  |
| HADSanxiety                   | 91                     | 6<br>(4-10)               | 36                        | 5<br>(3-10)               | 1.151                     | 0.250 | 0.102  |
| FIS                           | 91                     | 89<br>(74-113)            | 36                        | 93.5<br>(63.8-113)        | 0.701                     | 0.483 | 0.063  |
| BFI                           | 91                     | 5.6<br>(4.7-6.6)          | 36                        | 5.3<br>(4.6-6.6)          | 0.187                     | 0.851 | 0.017  |
| Subjective mental health      | 91                     | 5.4<br>(4.5-6.7)          | 36                        | 5.5<br>(4.9-7.1)          | -0.286                    | 0.775 | -0.025 |
| Work ability                  |                        |                           |                           |                           |                           |       |        |
| WAI score                     | 88                     | 25<br>(21-28)             | 35                        | 24<br>(20-28)             | -0.559                    | 0.576 | -0.050 |
| • Work ability                | 90                     | 3<br>(0.75-5)             | 36                        | 2<br>(0-4.75)             | -0.882                    | 0.378 | -0.079 |
| • Work requirements           | 89                     | 7<br>(6-8.75)             | 36                        | 7.75<br>(6-9)             | 0.705                     | 0.481 | 0.063  |

IQR = interquartile range.

**Table S2:** Groupwise comparison of male and female patients at timepoint T1

|                               | Male |                           | Female |                         | Between-group differences |         |        |
|-------------------------------|------|---------------------------|--------|-------------------------|---------------------------|---------|--------|
|                               | N    | Median (IQR)              | N      | Median (IQR)            | z                         | p       | r      |
| Physical Performance          |      |                           |        |                         |                           |         |        |
| 6MWD [m]                      | 30   | 532<br>(463.00-588.25)    | 97     | 517<br>(432.00-557.50)  | -1.084                    | 0.278   | -0.096 |
| 1MSTST                        | 30   | 18.50<br>(14.75-23.25)    | 96     | 20<br>(16-24)           | 0.938                     | 0.348   | 0.084  |
| Handgrip strength [kg]        | 30   | 38.35<br>(32.38-49.12)    | 97     | 25.43<br>(20.08-31.32)  | -5.480                    | < 0.001 | -0.486 |
| Quadriceps strength [kg]      | 30   | 134.99<br>(115.54-145.81) | 97     | 85.19<br>(65.23-113.05) | -4.975                    | < 0.001 | -0.442 |
| Subjective physical ability   | 30   | 5.72<br>(3.94-7.00)       | 96     | 4.61<br>(3.14-5.44)     | -2.559                    | 0.011   | -0.228 |
| Neuropsychological Parameters |      |                           |        |                         |                           |         |        |
| MoCA score                    | 30   | 27<br>(25-28.3)           | 97     | 27<br>(26-28)           | 0.301                     | 0.763   | 0.027  |
| DSST                          | 30   | 41<br>(34.5-47.5)         | 97     | 47<br>(38.5-54)         | 2.604                     | 0.009   | 0.231  |
| HADSdepression                | 30   | 8<br>(3.8-10.3)           | 97     | 7<br>(4-11)             | 0.287                     | 0.774   | 0.023  |
| HADSanxiety                   | 30   | 5<br>(3-10.3)             | 97     | 7<br>(4-11)             | 1.022                     | 0.307   | 0.091  |

[illegible]

|                               | Healthcare Workers |                           | Non-Healthcare Workers |                           | Between-group differences |       |        |
|-------------------------------|--------------------|---------------------------|------------------------|---------------------------|---------------------------|-------|--------|
|                               | N                  | Median (IQR)              | N                      | Median (IQR)              | z                         | p     | r      |
| Physical Performance          |                    |                           |                        |                           |                           |       |        |
| 6MWD [m]                      | 89                 | 517.00<br>(436.50-557.50) | 38                     | 537.50<br>(461.75-583.25) | 1.227                     | 0.220 | 0.109  |
| 1MSTST                        | 88                 | 20<br>(16-23.75)          | 38                     | 20.50<br>(14.50-25)       | 0.090                     | 0.928 | 0.008  |
| Handgrip strength [kg]        | 89                 | 26.87<br>(20.22-35.03)    | 38                     | 31.35<br>(24.00-36.08)    | 1.264                     | 0.206 | 0.112  |
| Quadriceps strength [kg]      | 89                 | 88.82<br>(67.10-120.97)   | 38                     | 124.16<br>(83.62-141.38)  | 2.788                     | 0.005 | 0.247  |
| Subjective physical ability   | 88                 | 4.78<br>(3.44-6.08)       | 38                     | 4.44<br>(3.28-6.22)       | -0.787                    | 0.431 | -0.070 |
| Neuropsychological Parameters |                    |                           |                        |                           |                           |       |        |
| MoCA score                    | 89                 | 27<br>(26-28)             | 38                     | 26.5<br>(25-28)           | -0.671                    | 0.502 | -0.056 |
| DSST                          | 89                 | 47<br>(39.5-53)           | 38                     | 41.5<br>(34-51.5)         | -1.475                    | 0.140 | -0.131 |
| HADSdepression                | 89                 | 8<br>(5-11)               | 38                     | 6<br>(3-9.3)              | -1.544                    | 0.123 | -0.137 |
| HADSanxiety                   | 89                 | 7<br>(4-11)               | 38                     | 5<br>(3-10)               | -1.748                    | 0.080 | -0.155 |
| FIS                           | 89                 | 98<br>(74.5-113.5)        | 38                     | 93.5<br>(63.8-113)        | -0.829                    | 0.407 | -0.074 |
| BFI                           | 89                 | 5.7<br>(4.4-7.1)          | 38                     | 5.3<br>(4.6-6.6)          | -0.487                    | 0.626 | -0.043 |
| Subjective mental health      | 89                 | 5.3<br>(4.2-6.3)          | 38                     | 5.5<br>(4.9-7.1)          | 1.764                     | 0.078 | 0.157  |
| Work ability                  |                    |                           |                        |                           |                           |       |        |
| WAI score                     | 85                 | 24<br>(20.75-27)          | 38                     | 25.25<br>(21-31)          | 1.236                     | 0.219 | 0.111  |
| • Work ability                | 88                 | 3<br>(0-5)                | 38                     | 3.5<br>(0.75-5.25)        | 0.943                     | 0.345 | 0.084  |
| • Work requirements           | 87                 | 7.5<br>(6-9)              | 38                     | 7<br>(6-8.63)             | -1.163                    | 0.245 | -0.104 |

IQR = interquartile range.

|                               |    |                           |                           |                         |    |                           |                           |                         |        |       |        |
|-------------------------------|----|---------------------------|---------------------------|-------------------------|----|---------------------------|---------------------------|-------------------------|--------|-------|--------|
| 6MWD [m]                      | 87 | 525.00<br>(440.00-583.00) | 584.00<br>(522.00-644.00) | 59.00<br>(20.00-112.00) | 32 | 498.50<br>(447.75-542.75) | 571.50<br>(522.50-611.75) | 78.50<br>(44.00-122.75) | 1.013  | 0.311 | 0.093  |
| 1MSTST                        | 86 | 20<br>(16-24)             | 22<br>(18-26)             | 2<br>(-1-5)             | 32 | 17.50<br>(14-22)          | 20<br>(16.25-24.50)       | 2<br>(0.25-4)           | 0.407  | 0.684 | 0.038  |
| Handgrip strength [kg]        | 89 | 27.90<br>(20.83-35.30)    | 30.37<br>(20.98-36.58)    | -0.13<br>(-2.32-4.75)   | 32 | 26.90<br>(20.33-34.83)    | 28.68<br>(21.38-33.49)    | -0.50<br>(-3.26-3.45)   | -1.061 | 0.289 | -0.097 |
| Quadriceps strength [kg]      | 88 | 92.96<br>(69.59-130.37)   | 110.13<br>(89.83-146.73)  | 12.75<br>(0.54-25.57)   | 32 | 103.59<br>(65.9-133.74)   | 114.39<br>(81.06-144.57)  | 13.82<br>(-0.24-34.14)  | -0.199 | 0.842 | -0.018 |
| Subjective physical ability   | 79 | 4.78<br>(3.56-6)          | 6.00<br>(4.67-7.22)       | 1.22<br>(0.22-2.22)     | 33 | 4.61<br>(3.03-6.19)       | 5.33<br>(3.94-7.17)       | 0.56<br>(0.11-2.44)     | -0.537 | 0.592 | -0.051 |
| Neuropsychological Parameters |    |                           |                           |                         |    |                           |                           |                         |        |       |        |
| MoCA                          | 88 | 27<br>(26-29)             | 27.5<br>(26-29)           | 0<br>(-1-2)             | 34 | 26<br>(25-27)             | 27<br>(25.8-28.3)         | 1<br>(-1-2)             | 0.966  | 0.334 | 0.088  |
| DSST                          | 88 | 47<br>(39-54)             | 51<br>(42-58)             | 2<br>(-1-6)             | 34 | 41<br>(34.3-49.8)         | 46.5<br>(35.8-54.5)       | 4<br>(-0.25-6.3)        | 0.701  | 0.483 | 0.064  |
| HADSdepression                | 88 | 7<br>(4-10)               | 5<br>(3-9)                | -1<br>(-3-0)            | 34 | 9<br>(4.3-11.8)           | 7<br>(3-11)               | -1<br>(-3-0.25)         | -0.280 | 0.780 | -0.025 |
| HADSanxiety                   | 88 | 6<br>(4-10)               | 5<br>(2.5-9)              | -1<br>(-3-0)            | 34 | 7.5<br>(4-12)             | 7<br>(3-11)               | -1.5<br>(-2-0)          | -0.211 | 0.833 | -0.019 |
| FIS                           | 87 | 89<br>(74-113)            | 82<br>(65-111)            | -4<br>(-16-4)           | 33 | 101.5<br>(69.3-113.5)     | 92<br>(49.5-115)          | -7<br>(-22-5)           | -0.703 | 0.482 | -0.064 |
| BFI                           | 88 | 5.6<br>(4.7-6.6)          | 5.2<br>(3.8-6.3)          | -0.33<br>(-1-0.33)      | 34 | 5.5<br>(4-7.3)            | 5.6<br>(3.8-7.1)          | -0.06<br>(-1.2-0.69)    | 0.911  | 0.362 | 0.082  |
| Subjective mental health      | 88 | 5.4<br>(4.5-6.6)          | 6.0<br>(4.5-7.2)          | 0.27<br>(-0.43-1.27)    | 34 | 5.2<br>(4.5-6.3)          | 5.8<br>(4-7.7)            | 0.5<br>(-0.4-1.3)       | 0.306  | 0.760 | 0.027  |
| Work Ability                  |    |                           |                           |                         |    |                           |                           |                         |        |       |        |
| WAI score                     | 82 | 25<br>(21-28)             | 24.25<br>(22-28)          | 0<br>(-2-2)             | 33 | 24<br>(20-28)             | 25.25<br>(20-31)          | 1<br>(-1-2)             | 1.444  | 0.149 | 0.134  |
| • Work ability                | 84 | 3<br>(1-5)                | 3<br>(1-5.75)             | 0<br>(-1-1.75)          | 34 | 2<br>(0-4.75)             | 3<br>(0-6)                | 0<br>(0-2)              | 1.271  | 0.204 | 0.117  |
| • Work require ments          | 83 | 7<br>(6-8.63)             | 7<br>(6-8)                | 0<br>(-1-1)             | 34 | 7.75<br>(6-9)             | 8<br>(6-9.13)             | 0<br>(-1-0.25)          | 0.607  | 0.544 | 0.056  |

IQR = interquartile range.

**Table S5:** Groupwise comparison of male and female COVID-19 patients regarding the outcomes of an inpatient rehabilitation program

| Physical Performance          |    |                           |                           |                         |    |                           |                           |                         |        |       |        |
|-------------------------------|----|---------------------------|---------------------------|-------------------------|----|---------------------------|---------------------------|-------------------------|--------|-------|--------|
|                               | N  | Pre<br>Median<br>(IQR)    | Post<br>Median<br>(IQR)   | Δ                       | N  | Pre<br>Median<br>(IQR)    | Post<br>Median<br>(IQR)   | Δ                       | z      | p     | r      |
| 6MWD [m]                      | 28 | 532.00<br>(463.00-588.25) | 592.50<br>(534.25-687.00) | 77.00<br>(45.50-102.25) | 91 | 517.00<br>(432.00-557.50) | 576.00<br>(520.00-627.00) | 59.00<br>(25.00-122.00) | -0.044 | 0.965 | -0.004 |
| 1MSTST                        | 29 | 18.50<br>(14.75-23.25)    | 19<br>(16-24.50)          | 1<br>(-1-3)             | 89 | 20<br>(16-24)             | 22<br>(18-27)             | 2<br>(0-5.50)           | 1.740  | 0.082 | 0.160  |
| Handgrip strength [kg]        | 29 | 38.35<br>(32.38-49.12)    | 39.33<br>(30.18-48.45)    | -0.53<br>(-5.85-5.88)   | 92 | 25.43<br>(20.08-31.32)    | 26.87<br>(19.90-32.15)    | -0.15<br>(-2.15-3.28)   | 0.452  | 0.651 | 0.041  |
| Quadriceps strength [kg]      | 29 | 134.98<br>(115.53-145.80) | 146.81<br>(125.16-182.35) | 10.91<br>(0.14-31.79)   | 91 | 85.18<br>(65.23-113.04)   | 103.70<br>(84.18-126.22)  | 12.94<br>(0.60-30.33)   | 0.285  | 0.776 | 0.026  |
| Subjective physical ability   | 25 | 5.72<br>(3.94-7)          | 6.56<br>(4-7.83)          | 1.00<br>(-0.61-1.78)    | 87 | 4.56<br>(3.17-5.44)       | 5.78<br>(4.56-7.11)       | 1.22<br>(0.22-2.44)     | 1.661  | 0.097 | 0.157  |
| Neuropsychological Parameters |    |                           |                           |                         |    |                           |                           |                         |        |       |        |
| MoCA                          | 29 | 27<br>(25-28.3)           | 27<br>(27-28)             | 0<br>(-1-1.5)           | 93 | 27<br>(26-28)             | 27<br>(26-29)             | 0<br>(-1-2)             | 0.576  | 0.565 | 0.052  |

|                          |    |                       |                    |                       |    |                  |                  |                      |        |       |        |
|--------------------------|----|-----------------------|--------------------|-----------------------|----|------------------|------------------|----------------------|--------|-------|--------|
| DSST                     | 29 | 41<br>(34.5-47.5)     | 43<br>(35-51.5)    | 2<br>(-2.5-5)         | 93 | 47<br>(38.5-54)  | 51<br>(43-57.5)  | 3<br>(-1-6.5)        | 0.428  | 0.428 | 0.039  |
| HADSdepression           | 29 | 8<br>(3.8-10.3)       | 5<br>(2.5-10.5)    | -1<br>(-1-0.5)        | 93 | 7<br>(4-11)      | 6<br>(3-9)       | -1<br>(-3-0)         | -0.513 | 0.608 | -0.046 |
| HADSanxiety              | 29 | 5<br>(3-10.3)         | 5<br>(2-9)         | -1<br>(-2-0)          | 93 | 7<br>(4-11)      | 6<br>(3-10)      | -1<br>(-3-0)         | -0.505 | 0.614 | -0.045 |
| FIS                      | 29 | 83.5<br>(60.3-110.5)  | 71<br>(49.5-112.5) | -2<br>(-12.5-4.5)     | 91 | 99<br>(77.5-115) | 87<br>(68-111)   | -6<br>(-21-4)        | -0.782 | 0.434 | -0.071 |
| BFI                      | 29 | 5.2<br>(3.9-6.7)      | 4.7<br>(3.1-7.3)   | -0.22<br>(-0.94-0.39) | 93 | 5.6<br>(4.7-7)   | 5.3<br>(4-6.4)   | -0.22<br>(-1.1-0.47) | 0.289  | 0.773 | 0.026  |
| Subjective mental health | 29 | 5.6<br>(4.6-7.0)      | 6.2<br>(4.2-7.9)   | 0.36<br>(-0.36-1.36)  | 93 | 5.3<br>(4.5-6.3) | 5.8<br>(4.5-7)   | -0.27<br>(-0.41-1.1) | 0.078  | 0.938 | 0.007  |
| Work Ability             |    |                       |                    |                       |    |                  |                  |                      |        |       |        |
| WAI score                | 25 | 24.25<br>(20.63-29.5) | 25<br>(19.38-29.5) | 0<br>(-2-1.5)         | 90 | 25<br>(21-27.75) | 24.75<br>(21-28) | 0<br>(-2-3)          | 0.490  | 0.624 | 0.045  |
| • Work ability           | 27 | 4<br>(1.75-5.25)      | 4<br>(1-6)         | 0<br>(-1-2)           | 91 | 3<br>(0-5)       | 3<br>(0-6)       | 0<br>(-1-2)          | 0.160  | 0.987 | 0.014  |
| • Work require ments     | 27 | 7<br>(6-9)            | 6<br>(5-8)         | 0<br>(-1-0)           | 90 | 7.5<br>(6-9)     | 7<br>(6-8)       | 0<br>(-1-1)          | 0.617  | 0.537 | 0.057  |

IQR = interquartile range.

**Table S6:** Groupwise comparison of healthcare and non-healthcare workers regarding the outcomes of an inpatient rehabilitation program

| Healthcare workers            |    |                           |                           |                         | Non-healthcare workers |                           |                        |                        | Between-group difference |       |        |
|-------------------------------|----|---------------------------|---------------------------|-------------------------|------------------------|---------------------------|------------------------|------------------------|--------------------------|-------|--------|
|                               | N  | Pre Median (IQR)          | Post Median (IQR)         | Δ                       | N                      | Pre Median (IQR)          | Post Median (IQR)      | Δ                      | z                        | p     | r      |
| Physical Performance          |    |                           |                           |                         |                        |                           |                        |                        |                          |       |        |
| 6MWD [m]                      | 84 | 517.00<br>(436.50-557.50) | 574.50<br>(520.50-626.00) | 77.50<br>(32.00-120.75) | 35                     | 537.50<br>(461.75-583.25) | 587<br>(539.00-663.00) | 50.00<br>(25.00-85.00) | -1.286                   | 0.198 | -0.118 |
| 1MSTS                         | 83 | 20<br>(16-23.75)          | 22<br>(18-26)             | 2<br>(-1-5)             | 35                     | 20.50<br>(14.50-25)       | 22<br>(17-27)          | 2<br>(-1-4)            | -0.396                   | 0.692 | -0.037 |
| Handgrip strength [kg]        | 85 | 26.87<br>(20.22-35.03)    | 27.90<br>(21.02-34.27)    | -0.17<br>(-2.42-4.77)   | 36                     | 31.35<br>(24.00-36.08)    | 30.47<br>(21.03-37.16) | -0.15<br>(-4.38-2.98)  | -0.544                   | 0.586 | -0.050 |
| Quadriceps strength [kg]      | 84 | 88.81<br>(67.1-120.96)    | 105.61<br>(86.41-136.41)  | 13.02<br>(0.71-31.55)   | 36                     | 124.16<br>(83.6-141.37)   | 124.69<br>(103-158.86) | 12.47<br>(0.04-25.18)  | -0.395                   | 0.693 | -0.036 |
| Subjective physical ability   | 78 | 4.78<br>(3.44-6.06)       | 5.78<br>(4.53-7.22)       | 1.17<br>(0.08-2.22)     | 34                     | 4.44<br>(3.28-6.22)       | 5.78<br>(4.53-7.17)    | 1.00<br>(0.22-2.25)    | 0.063                    | 0.950 | 0.006  |
| Neuropsychological Parameters |    |                           |                           |                         |                        |                           |                        |                        |                          |       |        |
| MoCA                          | 85 | 27<br>(26-28)             | 27<br>(26-29)             | 0<br>(-1-2)             | 37                     | 26.5<br>(25-28)           | 27<br>(25-29)          | 0<br>(-1-2)            | -0.595                   | 0.552 | -0.054 |
| DSST                          | 85 | 47<br>(39.5-53)           | 51<br>(43.5-57)           | 3<br>(-0.5-6)           | 37                     | 41.5<br>(34-51.5)         | 44<br>(35-56)          | 0<br>(-3-6)            | -1.554                   | 0.120 | -0.141 |
| HADSdepression                | 85 | 8<br>(5-11)               | 6<br>(3-10)               | -1<br>(-3-0)            | 37                     | 6<br>(3-9.3)              | 5<br>(4-10.5)          | 0<br>(-1-1)            | 2.152                    | 0.031 | 0.194  |
| HADSanxiety                   | 85 | 7<br>(4-11)               | 6<br>(3-10)               | -2<br>(-3-0)            | 37                     | 5<br>(3-10)               | 4<br>(2.5-9)           | -1<br>(-2-0.5)         | 1.458                    | 0.145 | 0.132  |
| FIS                           | 83 | 98<br>(74.5-113.5)        | 85<br>(65-111)            | -6<br>(-22-6)           | 37                     | 93.5<br>(63.8-113)        | 88<br>(64.5-113)       | -3<br>(-11-3.5)        | 0.873                    | 0.383 | 0.08   |
| BFI                           | 85 | 5.7<br>(4.4-7.1)          | 5.3<br>(3.6-6.7)          | -0.33<br>(-1.3-0.44)    | 37                     | 5.3<br>(4.6-6.6)          | 5.3<br>(3.9-6.4)       | -0.11<br>(-0.72-0.33)  | 0.986                    | 0.324 | 0.089  |
| Subjective mental health      | 85 | 5.3<br>(4.2-6.3)          | 5.8<br>(4.5-7.3)          | 0.45<br>(-0.18-1.18)    | 37                     | 5.5<br>(4.9-7.1)          | 6<br>(4.7-7.2)         | 0.9<br>(-0.59-1.4)     | -1.315                   | 0.188 | -0.119 |
| Work Ability                  |    |                           |                           |                         |                        |                           |                        |                        |                          |       |        |
| WAI score                     | 79 | 24.25<br>(20.88-27)       | 24.00<br>(21.00-28.00)    | 0.00<br>(-2.00-3.00)    | 36                     | 25.25<br>(21-31)          | 25.00<br>(21.25-29.38) | 0.00<br>(-2.00-1.88)   | -0.615                   | 0.539 | 0.057  |
| • Work ability                | 82 | 3<br>(0-5)                | 3<br>(0-6)                | 0<br>(-0.25-2)          | 36                     | 3.5<br>(0.75-5.25)        | 2.5<br>(1-6)           | 0<br>(-1-1)            | -1.164                   | 0.244 | -0.107 |
| • Work                        | 81 | 7.5                       | 7                         | 0                       | 36                     | 7                         | 7                      | 0                      | 0.990                    | 0.322 | 0.091  |

|                  |       |       |           |          |         |        |
|------------------|-------|-------|-----------|----------|---------|--------|
| require<br>ments | (6-9) | (6-8) | (-1-0.25) | (6-8.63) | (6-8.5) | (-1-1) |
|------------------|-------|-------|-----------|----------|---------|--------|

---

IQR = interquartile range.
